# Supplementary material for: La espontaneidad de Picasso y la razón vital de Ortega
Source: Springer Nature journal article supplement (doi:10.1007/s15010-015-0833-3), 1994-01-01
Supplement: MOESM1 [file 9302872]

**Fig. S1** Clinical failure rates<sup>a</sup> at 8 weeks post-therapy in overall and in patients with or without *P. aeruginosa* at enrolment (ITT population, N = 1352)

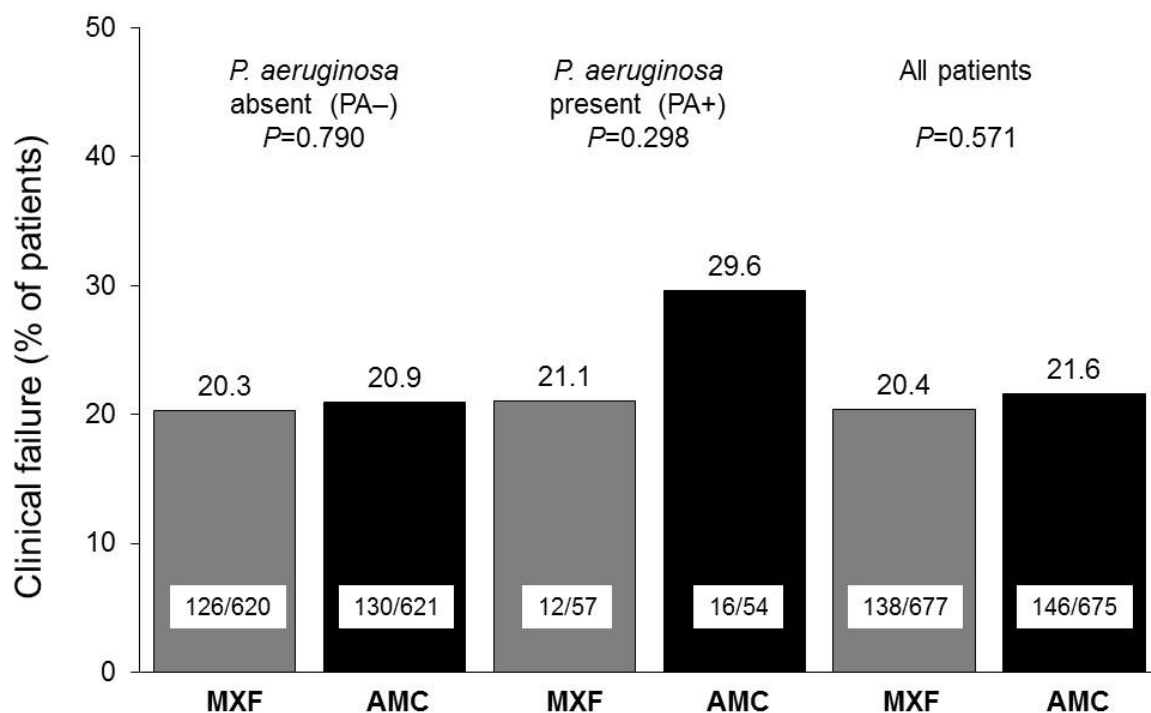

<sup>a</sup> Failure and relapse; AMC = amoxicillin/clavulanic acid; ITT = intent-to-treat; MXF = moxifloxacin
