# Supplementary material for: La espontaneidad de Picasso y la razón vital de Ortega
Source: Springer Nature journal article supplement (doi:10.1007/s15010-015-0833-3), 1994-01-01
Supplement: MOESM2 [file 9302872]

## Supplementary Tables

1. List of pre-therapy clinical, demographic, medical history factors with definitions included in univariate and multivariate analyses
2. Persisting bacteria up to 8 weeks post-therapy (ITT with pathogens population)
3. Superinfecting bacteria during therapy or at end of therapy (ITT population)
4. Reinfected bacteria isolated during follow-up at 4 or 8 weeks post-therapy (ITT population)
5. Susceptibility data of superinfecting and reinfected pathogens
6. Bacteriological success by pathogen during the study (ITT and PP with pathogens populations)

Table S1. List of pre-therapy clinical, demographic, medical history factors and results of the univariate analysis for bacteria presence prediction

| Variable/Prognostic factor               |                                                                             | Univariate analysis result |
|------------------------------------------|-----------------------------------------------------------------------------|----------------------------|
|                                          |                                                                             | P value                    |
| <b>Demographic parameter</b>             |                                                                             |                            |
| 1                                        | Region <sup>a</sup>                                                         | >0.1                       |
| 2                                        | Race <sup>b</sup>                                                           | >0.1                       |
| 3                                        | Gender                                                                      | <b>0.0642</b>              |
| 4                                        | BMI group <sup>c</sup>                                                      | >0.1                       |
| 5                                        | Age (65 yrs)                                                                | <b>0.0003</b>              |
| 6                                        | Employment status <sup>e</sup>                                              | >0.1                       |
| 7                                        | Smoking status <sup>e</sup>                                                 | >0.1                       |
| 8                                        | Alcohol <sup>f</sup>                                                        | <b>0.0461</b>              |
| <b>Medical history</b>                   |                                                                             |                            |
| 9                                        | Diabetes <sup>e</sup>                                                       | <b>0.095</b>               |
| 10                                       | Cardiac disorders <sup>e</sup>                                              | >0.1                       |
| 11                                       | Respiratory disorders <sup>e</sup>                                          | <b>0.0703</b>              |
| 12                                       | History of cardiopulmonary disease <sup>e</sup>                             | <b>0.0106</b>              |
| 13                                       | History of respiratory failure <sup>e</sup>                                 | <b>0.0349</b>              |
| 14                                       | Duration of chronic bronchitis <sup>g</sup>                                 | >0.1                       |
| <b>Anamnesis related to exacerbation</b> |                                                                             |                            |
| 15                                       | Heart rate (> or ≤ 90 beats/min)                                            | >0.1                       |
| 16                                       | Respiration rate (> or ≤ 20/min)                                            | >0.1                       |
| 17                                       | Body temperature (< 36.0°C, 36-37°C, or ≥37°C)                              | >0.1                       |
| 18                                       | % predicted FEV <sub>1</sub> <sup>h</sup>                                   | <b>0.021</b>               |
| 19                                       | Time since last exacerbation <sup>i</sup>                                   | >0.1                       |
| 20                                       | Number of episodes of acute exacerbation in the last 12 months <sup>j</sup> | >0.1                       |
| 21                                       | Exacerbation in last 3 months <sup>e</sup>                                  | <b>0.0688</b>              |
| 22                                       | Cough frequency pre-exacerbation <sup>k</sup>                               | <b>0.0966</b>              |
| 23                                       | Cough frequency at exacerbation <sup>k</sup>                                | >0.1                       |
| 24                                       | Dyspnea pre-exacerbation <sup>l</sup>                                       | >0.1                       |
| 25                                       | Dyspnea at exacerbation <sup>m</sup>                                        | >0.1                       |

|                                                  |                                                                                         |               |
|--------------------------------------------------|-----------------------------------------------------------------------------------------|---------------|
| 26                                               | Wheeze pre-exacerbation <sup>l</sup>                                                    | <b>0.0468</b> |
| 27                                               | Wheeze at exacerbation <sup>l</sup>                                                     | <b>0.0327</b> |
| 28                                               | Chest discomfort pre-exacerbation <sup>l</sup>                                          | <b>0.02</b>   |
| 29                                               | Chest discomfort at exacerbation <sup>l</sup>                                           | >0.1          |
| <b>Medications</b>                               |                                                                                         |               |
| 30                                               | Co-administration of systemic corticosteroids for the current exacerbation <sup>e</sup> | >0.1          |
| 31                                               | Inhaled steroids <sup>e</sup>                                                           | >0.1          |
| 32                                               | Bronchodilator use <sup>e</sup>                                                         | <b>0.004</b>  |
| 33                                               | Xanthine use <sup>e</sup>                                                               | <b>0.004</b>  |
| 34                                               | LABA use <sup>e</sup>                                                                   | >0.1          |
| 35                                               | SABA use <sup>e</sup>                                                                   | <b>0.0804</b> |
| 36                                               | Long-acting anticholinergic use <sup>e</sup>                                            | >0.1          |
| 37                                               | Short-acting anticholinergic use <sup>e</sup>                                           | <b>0.0148</b> |
| <b>Sputum</b>                                    |                                                                                         |               |
| 38                                               | Sputum color <sup>n</sup>                                                               | >0.1          |
| 39                                               | Sputum quality <sup>o</sup>                                                             | >0.1          |
| 40                                               | Sputum volume <sup>p</sup>                                                              | >0.1          |
| 41                                               | Sputum viscosity <sup>q</sup>                                                           | <b>0.0147</b> |
| <b>AECB-SS details</b>                           |                                                                                         |               |
| 42                                               | AECB-SS cough phlegm                                                                    | >0.1          |
| 43                                               | AECB-SS color phlegm                                                                    | <b>0.0214</b> |
| 44                                               | AECB-SS difficulty breathing                                                            | >0.1          |
| 45                                               | AECB-SS sleep disturbance                                                               | >0.1          |
| 46                                               | AECB-SS disturbed during day                                                            | <b>0.0888</b> |
| 47                                               | AECB-SS cough frequency                                                                 | >0.1          |
| 48                                               | AECB-SS phlegm description                                                              | >0.1          |
| <b>Organisms related to acute exacerbation</b>   |                                                                                         |               |
| 49                                               | Organisms present in sputum pre-therapy <sup>e</sup>                                    | NA            |
| 50                                               | Number of organisms in sputum pre-therapy <sup>r</sup>                                  | NA            |
| 51                                               | Positive culture at EOT <sup>e</sup>                                                    | NA            |
| 52                                               | Number of organisms in sputum at EOT <sup>r</sup>                                       | NA            |
| 53                                               | Resistance to study drug <sup>e</sup>                                                   | NA            |
| <b>Pathogenic bacteria in sputum pre-therapy</b> |                                                                                         |               |
| 54                                               | <i>H. influenzae</i>                                                                    | NA            |
| 55                                               | <i>P. aeruginosa</i>                                                                    | NA            |

|    |                       |    |
|----|-----------------------|----|
| 56 | <i>S. pneumoniae</i>  | NA |
| 57 | <i>M. catarrhalis</i> | NA |
| 58 | <i>S. aureus</i>      | NA |

<sup>a</sup> Asia Pacific, EU/Canada/South Africa, Latin America; <sup>b</sup> White, black, Asian, American Indian/Alaskan native, Hispanic or uncodable; <sup>c</sup> ≤20 mg/k/m<sup>2</sup>, 21–25 mg/k/m<sup>2</sup>, 26–30 mg/k/m<sup>2</sup>, 31–35 mg/k/m<sup>2</sup> or >35 mg/k/m<sup>2</sup>; <sup>d</sup> unemployed, employed, retired; <sup>e</sup> yes or no; <sup>f</sup> abstinent, light alcohol use or moderate alcohol use; <sup>g</sup> <10 yrs, ≤10 yrs and <20 yrs, ≤20 yrs; <sup>h</sup> <30 %, ≤30 % and <60 %, ≤60 %; <sup>i</sup> ≤2 mo, <2 mo and ≤3 mo, <3 and ≤6 mo, <6 mo; <sup>j</sup> 1–5; <sup>k</sup> none, mild, moderate or severe; <sup>l</sup> absent, present; <sup>m</sup> same as baseline, slightly increased or greatly increased; <sup>n</sup> clear, yellow, green, rust; <sup>o</sup> clear, mucoid, mucopurulent, purulent; <sup>p</sup> ≤5 ml, 6–15 ml, 16–30 ml, 31–50 ml, >50 ml; <sup>q</sup> liquid, thick, very thick, quite thick; <sup>r</sup> 0–4; BMI = body mass index; EOT = end of therapy; FEV<sub>1</sub> = forced expiratory volume in 1 second; AECSB-SS = acute exacerbation of chronic bronchitis symptom scale; LABA = long-acting beta-2 agonist; SABA = short-acting beta-2 agonist; NA = not applicable

Table S2. Persisting bacteria up to 8 weeks post-therapy in the ITT with pathogens (N = 662) and PP with pathogens (N = 521) populations

|                                              | ITT with pathogens |          | PP with pathogens |          |
|----------------------------------------------|--------------------|----------|-------------------|----------|
|                                              | MXF                | AMC      | MXF               | AMC      |
|                                              | n (%)              | n (%)    | n (%)             | n (%)    |
| <b>Gram-positive</b>                         |                    |          |                   |          |
| <b><i>Staphylococcus aureus</i>, n</b>       | 23                 | 20       | 18                | 17       |
| During therapy                               | 5 (21.7)           | 4 (20.0) | 4 (22.2)          | 4 (23.5) |
| EOT                                          | 3 (13.0)           | 4 (20.0) | 3 (16.7)          | 4 (23.5) |
| 4 weeks                                      | 2 (8.6)            | 9 (45.0) | 2 (11.1)          | 8 (47.1) |
| 8 weeks                                      | 4 (17.4)           | 6 (30.0) | 4 (22.2)          | 5 (29.4) |
| <b><i>Staphylococcus haemolyticus</i>, n</b> | 0                  | 1        | 0                 | 1        |
| During therapy                               | 0                  | 1 (100)  | 0                 | 1 (100)  |
| EOT                                          | 0                  | 0        | 0                 | 0        |
| 4 weeks                                      | 0                  | 0        | 0                 | 0        |
| 8 weeks                                      | 0                  | 0        | 0                 | 0        |
| <b><i>Streptococcus pneumoniae</i>, n</b>    | 49                 | 38       | 41                | 30       |
| During therapy                               | 1 (2.0)            | 1 (2.6)  | 1 (2.4)           | 1 (3.3)  |
| EOT                                          | 5 (10.2)           | 4 (10.6) | 5 (12.2)          | 4 (13.3) |
| 4 weeks                                      | 11 (22.4)          | 6 (15.8) | 9 (22.0)          | 5 (16.6) |
| 8 weeks                                      | 11 (22.4)          | 6 (15.8) | 9 (22.0)          | 5 (16.6) |
| <b><i>Streptococcus spp</i>, n</b>           | 3                  | 5        | 2                 | 4        |
| During therapy                               | 1 (33.3)           | 1 (20.0) | 0                 | 1 (25.0) |
| EOT                                          | 2 (66.7)           | 1 (20.0) | 1 (50.0)          | 0        |
| 4 weeks                                      | 1 (33.3)           | 1 (20.0) | 1 (50.0)          | 2 (50.0) |
| 8 weeks                                      | 1 (33.3)           | 3 (60.0) | 0                 | 2 (50.0) |
| <b><i>Streptococcus pyogenes</i>, n</b>      | 0                  | 3        | 0                 | 2        |
| During therapy                               | 0                  | 0        | 0                 | 0        |
| EOT                                          | 0                  | 0        | 0                 | 0        |
| 4 weeks                                      | 0                  | 1 (33.3) | 0                 | 1 (50.0) |
| 8 weeks                                      | 0                  | 2 (66.6) | 0                 | 1 (50.0) |

| <b>Gram-negative non-Enterobacteriaceae</b> |           |           |           |           |
|---------------------------------------------|-----------|-----------|-----------|-----------|
| <b><i>Pseudomonas aeruginosa</i>, n</b>     | 57        | 54        | 47        | 38        |
| During therapy                              | 25 (43.9) | 25 (46.3) | 23 (48.9) | 19 (50.0) |
| EOT                                         | 26 (45.6) | 19 (35.2) | 18 (38.3) | 14 (36.8) |
| 4 weeks                                     | 21 (36.8) | 18 (33.3) | 17 (36.2) | 15 (39.8) |
| 8 weeks                                     | 16 (28.1) | 20 (37.0) | 13 (27.7) | 18 (47.4) |
| <b><i>Haemophilus influenzae</i>, n</b>     | 65        | 75        | 53        | 56        |
| During therapy                              | 3 (4.6)   | 9 (12.0)  | 2 (3.8)   | 8 (14.3)  |
| EOT                                         | 5 (7.7)   | 21 (28.0) | 4 (7.6)   | 14 (25.0) |
| 4 weeks                                     | 9 (13.8)  | 22 (29.4) | 8 (15.1)  | 17 (30.4) |
| 8 weeks                                     | 13 (20.0) | 27 (36.0) | 12 (22.6) | 21 (37.5) |
| <b><i>Haemophilus parainfluenzae</i>, n</b> | 5         | 13        | 4         | 10        |
| During therapy                              | 1 (20.0)  | 1 (7.7)   | 1 (25.0)  | 0         |
| EOT                                         | 0         | 2 (15.4)  | 0         | 1 (10.0)  |
| 4 weeks                                     | 0         | 2 (15.4)  | 0         | 1 (10.0)  |
| 8 weeks                                     | 1 (20.0)  | 3 (23.1)  | 1 (25.0)  | 2 (20.0)  |
| <b><i>Haemophilus spp</i>, n</b>            | 2         | 1         | 2         | 1         |
| During therapy                              | 0         | 0         | 0         | 0         |
| EOT                                         | 0         | 1 (100)   | 0         | 1 (100)   |
| 4 weeks                                     | 1 (50.0)  | 0         | 1 (50.0)  | 0         |
| 8 weeks                                     | 0         | 0         | 0         | 0         |
| <b><i>Haemophilus haemolyticus</i>, n</b>   | 1         | 0         | 1         | 0         |
| During therapy                              | 0         | 0         | 0         | 0         |
| EOT                                         | 0         | 0         | 0         | 0         |
| 4 weeks                                     | 0         | 0         | 0         | 0         |
| 8 weeks                                     | 1 (100.0) | 0         | 1 (100.0) | 0         |
| <b><i>Acinetobacter baumannii</i>, n</b>    | 12        | 6         | 11        | 5         |
| During therapy                              | 2 (16.7)  | 1 (16.7)  | 2 (18.2)  | 1 (20.0)  |
| EOT                                         | 2 (16.7)  | 2 (33.3)  | 1 (9.1)   | 2 (40.0)  |
| 4 weeks                                     | 4 (33.3)  | 3 (50.0)  | 0         | 1 (20.0)  |
| 8 weeks                                     | 3 (25.0)  | 0         | 3 (27.3)  | 0         |
| <b><i>Acinetobacter lwoffii</i>, n</b>      | 3         | 1         | 3         | 1         |

|                                               |           |           |           |           |
|-----------------------------------------------|-----------|-----------|-----------|-----------|
| During therapy                                | 1 (33.3)  | 0         | 1 (33.3)  | 0         |
| EOT                                           | 0         | 1 (100.0) | 0         | 1 (100.0) |
| 4 weeks                                       | 0         | 0         | 0         | 0         |
| 8 weeks                                       | 1 (33.3)  | 0         | 1 (33.3)  | 0         |
| <b><i>Moraxella catarrhalis</i>, n</b>        | 36        | 43        | 26        | 35        |
| During therapy                                | 1 (2.8)   | 5 (11.6)  | 1 (3.8)   | 5 (14.3)  |
| EOT                                           | 4 (11.1)  | 3 (7.0)   | 4 (15.4)  | 2 (5.7)   |
| 4 weeks                                       | 7 (19.4)  | 6 (13.9)  | 4 (15.4)  | 6 (17.1)  |
| 8 weeks                                       | 12 (33.3) | 8 (18.6)  | 9 (34.6)  | 7 (20.0)  |
| <b><i>Stenotrophomonas maltophilia</i>, n</b> | 2         | 6         | 1         | 6         |
| During therapy                                | 1 (50.0)  | 1 (16.7)  | 1 (100.0) | 1 (16.7)  |
| EOT                                           | 0         | 2 (33.3)  | 0         | 2 (33.3)  |
| 4 weeks                                       | 0         | 2 (33.3)  | 0         | 2 (33.3)  |
| 8 weeks                                       | 0         | 2 (33.3)  | 0         | 2 (33.3)  |
| <b><i>Morganella morganii</i>, n</b>          | 3         | 0         | 2         | 0         |
| During therapy                                | 0         | 0         | 0         | 0         |
| EOT                                           | 1 (33.3)  | 0         | 0         | 0         |
| 4 weeks                                       | 1 (33.3)  | 0         | 0         | 0         |
| 8 weeks                                       | 1 (33.3)  | 0         | 0         | 0         |
| <b><i>Burkholderia cepacia</i>, n</b>         | 1         | 1         | 1         | 1         |
| During therapy                                | 1 (100.0) | 0         | 1 (100.0) | 0         |
| EOT                                           | 1 (100.0) | 1 (100.0) | 1 (100.0) | 1 (100.0) |
| 4 weeks                                       | 1 (100.0) | 1 (100.0) | 1 (100.0) | 1 (100.0) |
| 8 weeks                                       | 1 (100.0) | 1 (100.0) | 1 (100.0) | 1 (100.0) |
| <b><i>Alcaligenes xylosoxidans</i>, n</b>     | 0         | 1         | 0         | 1         |
| During therapy                                | 0         | 0         | 0         | 0         |
| EOT                                           | 0         | 1 (100.0) | 0         | 1 (100.0) |
| 4 weeks                                       | 0         | 0         | 0         | 0         |
| 8 weeks                                       | 0         | 0         | 0         | 0         |
| <b>Enterobacteriaceae</b>                     |           |           |           |           |
| <b><i>Klebsiella pneumoniae</i>, n</b>        | 36        | 48        | 26        | 43        |
| During therapy                                | 6 (16.7)  | 24 (50.0) | 5 (19.2)  | 22 (51.2) |

|                                         |           |           |           |           |
|-----------------------------------------|-----------|-----------|-----------|-----------|
| EOT                                     | 12 (33.3) | 17 (35.4) | 9 (34.6)  | 14 (32.6) |
| 4 weeks                                 | 12 (33.3) | 11 (22.9) | 8 (30.8)  | 10 (23.3) |
| 8 weeks                                 | 9 (25.0)  | 12 (25.0) | 8 (30.8)  | 11 (25.6) |
| <b><i>Klebsiella oxytoca</i>, n</b>     | 11        | 4         | 11        | 1         |
| During therapy                          | 1 (9.1)   | 2 (50.0)  | 1 (9.1)   | 1 (100.0) |
| EOT                                     | 2 (18.2)  | 1 (25.0)  | 2 (18.2)  | 0         |
| 4 weeks                                 | 0         | 0         | 0         | 0         |
| 8 weeks                                 | 0         | 0         | 0         | 0         |
| <b><i>Escherichia coli</i>, n</b>       | 21        | 16        | 16        | 12        |
| During therapy                          | 3 (14.3)  | 6 (37.5)  | 2 (12.5)  | 5 (41.7)  |
| EOT                                     | 6 (28.6)  | 4 (25.0)  | 5 (31.3)  | 4 (33.3)  |
| 4 weeks                                 | 6 (28.6)  | 6 (37.5)  | 5 (31.3)  | 4 (33.3)  |
| 8 weeks                                 | 9 (42.9)  | 7 (43.8)  | 7 (43.8)  | 5 (41.7)  |
| <b><i>Enterobacter cloacae</i>, n</b>   | 11        | 8         | 10        | 5         |
| During therapy                          | 0         | 3 (37.5)  | 0         | 1 (20.0)  |
| EOT                                     | 2 (18.2)  | 0         | 2 (20.0)  | 0         |
| 4 weeks                                 | 2 (18.2)  | 0         | 2 (20.0)  | 0         |
| 8 weeks                                 | 3 (27.3)  | 0         | 3 (30.0)  | 0         |
| <b><i>Enterobacter aerogenes</i>, n</b> | 8         | 8         | 6         | 6         |
| During therapy                          | 1 (12.5)  | 3 (37.5)  | 1 (16.7)  | 3 (50.0)  |
| EOT                                     | 2 (25.0)  | 2 (25.0)  | 2 (33.3)  | 2 (33.3)  |
| 4 weeks                                 | 1 (12.5)  | 3 (37.5)  | 1 (16.7)  | 1 (16.7)  |
| 8 weeks                                 | 1 (12.5)  | 5 (62.5)  | 1 (16.7)  | 2 (33.3)  |
| <b><i>Serratia marcescens</i>, n</b>    | 14        | 14        | 11        | 12        |
| During therapy                          | 3 (21.4)  | 7 (50.0)  | 2 (18.2)  | 6 (50.0)  |
| EOT                                     | 4 (28.6)  | 4 (28.6)  | 3 (27.3)  | 3 (25.0)  |
| 4 weeks                                 | 2 (14.2)  | 3 (21.4)  | 1 (9.1)   | 3 (25.0)  |
| 8 weeks                                 | 3 (21.4)  | 3 (21.4)  | 2 (18.2)  | 3 (25.0)  |
| <b><i>Proteus mirabilis</i>, n</b>      | 4         | 9         | 2         | 8         |
| During therapy                          | 2 (50.0)  | 3 (33.3)  | 2 (100.0) | 8 (100.0) |
| EOT                                     | 3 (75.0)  | 3 (33.3)  | 2 (100.0) | 3 (37.5)  |
| 4 weeks                                 | 2 (50.0)  | 4 (44.4)  | 2 (100.0) | 4 (50.0)  |



|                                           |           |           |           |           |
|-------------------------------------------|-----------|-----------|-----------|-----------|
| 8 weeks                                   | 2 (50.0)  | 5 (55.5)  | 2 (100.0) | 5 (62.5)  |
| <b><i>Proteus vulgaris</i>, n</b>         | 0         | 2         | 0         | 2         |
| During therapy                            | 0         | 1 (50.0)  | 0         | 1 (50.0)  |
| EOT                                       | 0         | 0         | 0         | 0         |
| 4 weeks                                   | 0         | 0         | 0         | 0         |
| 8 weeks                                   | 0         | 0         | 0         | 0         |
| <b><i>Citrobacter freundii</i>, n</b>     | 1         | 1         | 1         | 1         |
| During therapy                            | 1 (100.0) | 0         | 1 (100.0) | 0         |
| EOT                                       | 0         | 1 (100.0) | 0         | 1 (100.0) |
| 4 weeks                                   | 0         | 1 (100.0) | 0         | 1 (100.0) |
| 8 weeks                                   | 0         | 1 (100.0) | 0         | 1 (100.0) |
| <b><i>Citrobacter koseri</i>, n</b>       | 6         | 7         | 5         | 5         |
| During therapy                            | 2 (33.3)  | 5 (71.4)  | 2 (40.0)  | 4 (80.0)  |
| EOT                                       | 3 (50.0)  | 6 (85.7)  | 3 (60.0)  | 4 (50.0)  |
| 4 weeks                                   | 2 (33.3)  | 5 (71.4)  | 1 (20.0)  | 3 (60.0)  |
| 8 weeks                                   | 2 (33.3)  | 5 (71.4)  | 1 (20.0)  | 3 (60.0)  |
| <b><i>Citrobacter amalonaticus</i>, n</b> | 1         | 1         | 1         | 1         |
| During therapy                            | 0         | 1 (100.0) | 0         | 1 (100.0) |
| EOT                                       | 0         | 0         | 0         | 0         |
| 4 weeks                                   | 0         | 0         | 0         | 0         |
| 8 weeks                                   | 0         | 1 (100.0) | 0         | 1 (100.0) |

number of patients with persisting pathogens; AMC = amoxicillin/clavulanic acid; EOT = end of therapy; ITT

= intent-to-treat; MXF = moxifloxacin; PP = per-protocol

Table S3. Superinfecting bacteria during therapy or at end of therapy (ITT population)

|                                     | <b>Total N=1352</b> | <b>MXF N=677</b> | <b>AMC N=675</b> |
|-------------------------------------|---------------------|------------------|------------------|
|                                     | <b>n (%)</b>        | <b>n (%)</b>     | <b>n (%)</b>     |
| <b>Any</b>                          | 148 (10.9)          | 65 (9.6)         | 83 (12.3)        |
| <i>Staphylococcus aureus</i>        | 17 (1.3)            | 9 (1.3)          | 8 (1.2)          |
| <i>Streptococcus pneumoniae</i>     | 14 (1.0)            | 5 (0.7)          | 9 (1.3)          |
| <i>Streptococcus</i> spp.           | 4 (0.3)             | 4 (0.6)          | 0 (-)            |
| <i>Enterococcus faecalis</i>        | 4 (0.3)             | 3 (0.4)          | 1 (0.15)         |
| <i>Streptococcus agalactiae</i>     | 2 (0.15)            | 2 (0.3)          | 0 (-)            |
| <i>Streptococcus anginosus</i>      | 2 (0.15)            | 1 (0.15)         | 1 (0.15)         |
| <i>Staphylococcus haemolyticus</i>  | 2 (0.15)            | 2 (0.3)          | 0 (-)            |
| <i>Streptococcus sanguis</i>        | 1 (0.07)            | 1 (0.15)         | 0 (-)            |
| <i>Streptococcus viridans</i>       | 1 (0.07)            | 0 (-)            | 1 (0.15)         |
| <i>Pseudomonas aeruginosa</i>       | 45 (3.3)            | 20 (3.0)         | 25 (3.7)         |
| <i>Haemophilus influenzae</i>       | 24 (1.8)            | 6 (0.9)          | 18 (2.7)         |
| <i>Acinetobacter baumannii</i>      | 22 (1.6)            | 13 (1.9)         | 9 (1.3)          |
| <i>Moraxella catarrhalis</i>        | 20 (1.5)            | 10 (1.5)         | 10 (1.5)         |
| <i>Haemophilus parainfluenzae</i>   | 9 (0.7)             | 4 (0.6)          | 5 (0.7)          |
| <i>Stenotrophomonas maltophilia</i> | 5 (0.4)             | 2 (0.3)          | 3 (0.4)          |
| <i>Acinetobacter lwoffii</i>        | 2 (0.15)            | 1 (0.15)         | 1 (0.15)         |
| <i>Morganella morganii</i>          | 2 (0.15)            | 0 (-)            | 2 (0.3)          |
| <i>Haemophilus parahaemolyticus</i> | 2 (0.15)            | 1 (0.15)         | 1 (0.15)         |
| <i>Haemophilus haemolyticus</i>     | 1 (0.07)            | 0 (-)            | 1 (0.15)         |
| <i>Burkholderia cepacia</i>         | 1 (0.07)            | 0 (-)            | 1 (0.15)         |
| <i>Klebsiella pneumoniae</i>        | 36 (2.7)            | 14 (2.1)         | 22 (3.3)         |
| <i>Enterobacter cloacae</i>         | 18 (1.3)            | 4 (0.6)          | 14 (2.1)         |
| <i>Escherichia coli</i>             | 18 (1.3)            | 8 (1.2)          | 10 (1.5)         |
| <i>Klebsiella oxytoca</i>           | 15 (1.1)            | 1 (0.15)         | 14 (2.1)         |
| <i>Serratia marcescens</i>          | 13 (1.0)            | 5 (0.7)          | 8 (1.2)          |
| <i>Proteus mirabilis</i>            | 7 (0.5)             | 4 (0.6)          | 3 (0.4)          |
| <i>Enterobacter aerogenes</i>       | 7 (0.5)             | 1 (0.15)         | 6 (0.9)          |

Determinants of bacteriological outcomes in exacerbations of chronic obstructive pulmonary disease; Infection; **Sethi S** et al. Division of Pulmonary, Critical Care and Sleep Medicine, University at Buffalo, State University of New York, Buffalo, New York, USA; [ssethi@buffalo.edu](mailto:ssethi@buffalo.edu)

|                                 |          |          |          |
|---------------------------------|----------|----------|----------|
| <i>Citrobacter freundii</i>     | 4 (0.3)  | 1 (0.15) | 3 (0.4)  |
| <i>Citrobacter koseri</i>       | 3 (0.2)  | 1 (0.15) | 2 (0.3)  |
| <i>Proteus vulgaris</i>         | 3 (0.2)  | 2 (0.3)  | 1 (0.15) |
| <i>Citrobacter amalonaticus</i> | 1 (0.07) | 0 (-)    | 1 (0.15) |
| <i>Klebsiella ozaenae</i>       | 1 (0.07) | 0 (-)    | 1 (0.15) |
| <i>Serratia odorifera</i>       | 1 (0.07) | 0 (-)    | 1 (0.15) |

number of patients with superinfection; AMC = amoxicillin/clavulanic acid; ITT = intent-to-treat; MXF = moxifloxacin

Table S4. Reinfesting bacteria isolated at 4 or 8 weeks post-therapy (ITT population)

|                                     | <b>Total N =<br/>1352</b> | <b>MXF N = 677</b> | <b>AMC N = 675</b> |
|-------------------------------------|---------------------------|--------------------|--------------------|
|                                     | <b>n (%)</b>              | <b>n (%)</b>       | <b>n (%)</b>       |
| <b>Any</b>                          | 119 (8.8)                 | 58 (8.6)           | 61 (9.0)           |
| <i>Streptococcus pneumoniae</i>     | 27 (2.0)                  | 11 (1.6)           | 16 (2.4)           |
| <i>Staphylococcus aureus</i>        | 9 (0.7)                   | 7 (1.0)            | 2 (0.3)            |
| <i>Enterococcus faecalis</i>        | 2 (0.15)                  | 2 (0.3)            | 0 (-)              |
| <i>Streptococcus agalactiae</i>     | 2 (0.15)                  | 2 (0.3)            | 0 (-)              |
| <i>Streptococcus anginosus</i>      | 1 (0.07)                  | 0 (-)              | 1 (0.15)           |
| <i>Streptococcus</i> spp.           | 1 (0.07)                  | 1 (0.15)           | 0 (-)              |
| <i>Pseudomonas aeruginosa</i>       | 39 (2.9)                  | 21 (3.1)           | 18 (2.7)           |
| <i>Haemophilus influenzae</i>       | 26 (1.9)                  | 7 (1.0)            | 19 (2.8)           |
| <i>Moraxella catarrhalis</i>        | 24 (1.8)                  | 16 (2.4)           | 8 (1.2)            |
| <i>Acinetobacter baumannii</i>      | 8 (0.6)                   | 4 (0.6)            | 4 (0.6)            |
| <i>Haemophilus parainfluenzae</i>   | 4 (0.3)                   | 3 (0.4)            | 1 (0.15)           |
| <i>Morganella morganii</i>          | 4 (0.3)                   | 3 (0.4)            | 1 (0.15)           |
| <i>Stenotrophomonas maltophilia</i> | 3 (0.2)                   | 2 (0.3)            | 1 (0.15)           |
| <i>Acinetobacter lwoffii</i>        | 1 (0.07)                  | 0 (-)              | 1 (0.15)           |
| <i>Burkholderia cepacia</i>         | 1 (0.07)                  | 1 (0.15)           | 0 (-)              |
| <i>Haemophilus parahaemolyticus</i> | 1 (0.07)                  | 0 (-)              | 1 (0.15)           |
| <i>Haemophilus</i> spp.             | 1 (0.07)                  | 0 (-)              | 1 (0.15)           |
| <i>Moraxella</i> spp.               | 1 (0.07)                  | 0 (-)              | 1 (0.15)           |
| <i>Klebsiella pneumoniae</i>        | 29 (2.1)                  | 14 (2.1)           | 15 (2.2)           |
| <i>Klebsiella oxytoca</i>           | 16 (1.2)                  | 5 (0.7)            | 11 (1.6)           |
| <i>Escherichia coli</i>             | 12 (0.9)                  | 8 (1.2)            | 4 (0.6)            |
| <i>Enterobacter cloacae</i>         | 12 (0.9)                  | 3 (0.4)            | 9 (1.3)            |
| <i>Serratia marcescens</i>          | 11 (0.8)                  | 6 (0.9)            | 5 (0.7)            |
| <i>Enterobacter aerogenes</i>       | 8 (0.6)                   | 5 (0.7)            | 3 (0.4)            |
| <i>Citrobacter koseri</i>           | 5 (0.4)                   | 2 (0.3)            | 3 (0.4)            |
| <i>Proteus mirabilis</i>            | 3 (0.2)                   | 1 (0.15)           | 2 (0.3)            |
| <i>Citrobacter freundii</i>         | 2 (0.15)                  | 1 (0.15)           | 1 (0.15)           |

Determinants of bacteriological outcomes in exacerbations of chronic obstructive pulmonary disease; Infection; Sethi S et al. Division of Pulmonary, Critical Care and Sleep Medicine, University at Buffalo, State University of New York, Buffalo, New York, USA; ssethi@buffalo.edu

|                           |          |          |       |
|---------------------------|----------|----------|-------|
| <i>Klebsiella ozaenae</i> | 1 (0.07) | 1 (0.15) | 0 (-) |
|---------------------------|----------|----------|-------|

number of patients with reinfection; AMC = amoxicillin/clavulanic acid; ITT = intent-to-treat; MXF = moxifloxacin

Table S5. Susceptibility data of superinfecting bacteria (ITT population)

| Organism                                   | Total number | MXF |              | AMC |              |
|--------------------------------------------|--------------|-----|--------------|-----|--------------|
|                                            |              | N   | Range (mg/L) | N   | Range (mg/L) |
| <i>Klebsiella pneumoniae</i> <sup>a</sup>  | 24           | 10  | 0.06–8.0     | 14  | 1.0–64.0     |
| <i>Pseudomonas aeruginosa</i> <sup>b</sup> | 21           | 12  | 0.5–4.0      | 9   | 32.0–64.0    |
| <i>Escherichia coli</i>                    | 11           | 5   | 0.03–8.0     | 6   | 4.0–8.0      |
| <i>Moraxella catarrhalis</i>               | 10           | 6   | 0.03–0.06    | 4   | 0.06–0.5     |
| <i>Klebsiella oxytoca</i> <sup>c</sup>     | 9            | -   | -            | 9   | 1.0–64.0     |
| <i>Staphylococcus aureus</i>               | 8            | 5   | 0.03–2.0     | 3   | 0.5–1.0      |
| <i>Haemophilus influenzae</i>              | 8            | 1   | 0.015        | 7   | 1.0–2.0      |
| <i>Enterobacter cloacae</i>                | 8            | 2   | 0.12–0.25    | 6   | 64.0–64.0    |
| <i>Serratia marcescens</i>                 | 7            | 3   | 0.06–8.0     | 4   | 8.0–64.0     |
| <i>Streptococcus pneumoniae</i>            | 6            | 3   | 0.012–2.0    | 3   | 2.0–4.0      |
| <i>Proteus mirabilis</i>                   | 5            | 3   | 0.5–8.0      | 2   | 1.0–64.0     |
| <i>Citrobacter freundii</i>                | 3            | -   | -            | 3   | 16.0–64.0    |
| <i>Enterobacter aerogenes</i>              | 2            | 1   | 0.12         | 1   | 64           |
| <i>Citrobacter koseri</i>                  | 2            | 1   | 0.06         | 1   | 2            |
| <i>Acinetobacter baumannii</i>             | 1            | 1   | 0.12         | -   | -            |
| <i>Proteus vulgaris</i>                    | 1            | -   | -            | 1   | 4            |
| <i>Serratia odorifera</i>                  | 1            | -   | -            | 1   | 2            |
| <i>Morganella morganii</i>                 | 1            | -   | -            | 1   | 2            |
| <i>Burkholderia cepacia</i>                | 1            | -   | -            | 1   | 2            |
| <i>Haemophilus parainfluenzae</i>          | 1            | -   | -            | 1   | 1            |

<sup>a</sup> MXF MIC<sub>50</sub> = 0.12 mg/L, MIC<sub>90</sub> = 0.25 mg/L; AMC MIC<sub>50</sub> = 2 mg/L, MIC<sub>90</sub> = 4 mg/L; <sup>b</sup> MXF MIC<sub>50</sub> =

2 mg/L, MIC<sub>90</sub> = 4 mg/L; AMC MIC<sub>50</sub> = 64 mg/L; <sup>c</sup> AMC MIC<sub>50</sub> = 2 mg/L; AMC =

amoxicillin/clavulanic acid; ITT = intent-to-treat; MXF = moxifloxacin

Table S6. Bacteriological success<sup>a</sup> by pathogen at the different time points (ITT and PP with pathogens populations)

|                                           | ITT with pathogens |           | PP with pathogens |           |
|-------------------------------------------|--------------------|-----------|-------------------|-----------|
|                                           | MXF                | AMC       | MXF               | AMC       |
|                                           | n (%)              | n (%)     | n (%)             | n (%)     |
| <b><i>Pseudomonas aeruginosa</i>, n</b>   | 57                 | 54        | 47                | 38        |
| During therapy                            | 31 (54.4)          | 28 (51.9) | 24 (51.1)         | 18 (47.4) |
| EOT                                       | 31 (54.4)          | 32 (59.3) | 29 (61.7)         | 22 (57.9) |
| 4 weeks                                   | 31 (54.4)          | 33 (61.1) | 29 (61.7)         | 23 (60.5) |
| 8 weeks                                   | 36 (63.2)          | 28 (51.9) | 34 (72.3)         | 20 (52.6) |
|                                           | <b>P = 0.228</b>   |           | <b>P = 0.061</b>  |           |
| <b><i>Streptococcus pneumoniae</i>, n</b> | 49                 | 38        | 41                | 30        |
| During therapy                            | 48 (98)            | 35 (92.1) | 40 (97.6)         | 29 (96.7) |
| EOT                                       | 44 (89.8)          | 33 (86.8) | 36 (87.8)         | 26 (86.7) |
| 4 weeks                                   | 36 (73.5)          | 29 (76.3) | 32 (78.0)         | 25 (83.3) |
| 8 weeks                                   | 37 (75.5)          | 27 (71.1) | 32 (78.0)         | 25 (83.3) |
|                                           | <b>P = 0.640</b>   |           | <b>P = 0.580</b>  |           |
| <b><i>Klebsiella pneumoniae</i>, n</b>    | 36                 | 48        | 26                | 43        |
| During therapy                            | 28 (77.8)          | 22 (45.8) | 21 (80.8)         | 20 (46.5) |
| EOT                                       | 21 (58.3)          | 29 (60.4) | 17 (65.4)         | 28 (65.1) |
| 4 weeks                                   | 19 (52.8)          | 34 (70.8) | 16 (61.5)         | 33 (76.7) |
| 8 weeks                                   | 22 (61.1)          | 33 (68.8) | 18 (69.2)         | 32 (74.4) |
|                                           | <b>P = 0.466</b>   |           | <b>P = 0.640</b>  |           |
| <b><i>Moraxella catarrhalis</i>, n</b>    | 36                 | 43        | 26                | 35        |
| During therapy                            | 32 (88.9)          | 36 (83.7) | 25 (96.2)         | 30 (85.7) |
| EOT                                       | 30 (83.3)          | 37 (86.0) | 22 (84.6)         | 33 (94.3) |
| 4 weeks                                   | 25 (69.4)          | 34 (79.1) | 21 (80.8)         | 29 (82.9) |
| 8 weeks                                   | 21 (58.3)          | 33 (76.7) | 17 (65.4)         | 28 (80.0) |
|                                           | <b>P = 0.080</b>   |           | <b>P = 0.199</b>  |           |
| <b><i>Staphylococcus aureus</i>, n</b>    | 23                 | 20        | 18                | 17        |
| During therapy                            | 18 (78.3)          | 16 (80.0) | 14 (77.8)         | 13 (76.5) |

Determinants of bacteriological outcomes in exacerbations of chronic obstructive pulmonary disease; Infection; **Sethi S** et al. Division of Pulmonary, Critical Care and Sleep Medicine, University at Buffalo, State University of New York, Buffalo, New York, USA; [ssethi@buffalo.edu](mailto:ssethi@buffalo.edu)

|                                   |                  |           |                  |           |
|-----------------------------------|------------------|-----------|------------------|-----------|
| EOT                               | 20 (87.0)        | 16 (80.0) | 15 (83.3)        | 13 (76.5) |
| 4 weeks                           | 21 (91.3)        | 11 (55.0) | 16 (88.9)        | 9 (52.9)  |
| 8 weeks                           | 18 (78.3)        | 14 (70.0) | 14 (77.8)        | 12 (70.6) |
|                                   | <b>P = 0.536</b> |           | <b>P = 0.627</b> |           |
| <b><i>Escherichia coli</i>, n</b> | 21               | 16        | 16               | 12        |
| During therapy                    | 17 (81.0)        | 10 (62.5) | 14 (87.5)        | 7 (58.3)  |
| EOT                               | 14 (66.7)        | 11 (68.8) | 11 (68.8)        | 8 (66.7)  |
| 4 weeks                           | 14 (66.7)        | 10 (62.5) | 11 (68.8)        | 8 (66.7)  |
| 8 weeks                           | 11 (52.4)        | 9 (56.3)  | 9 (56.3)         | 7 (58.3)  |
|                                   | <b>P = 0.815</b> |           | <b>P = 0.912</b> |           |

<sup>a</sup> Eradication + presumed eradication; AMC = amoxicillin/clavulanic acid; EOT = end of therapy;

ITT = intent-to-treat; MXF = moxifloxacin; PP = per-protocol
